# Supplementary material for: Unique pathological tau conformers from Alzheimer’s brains transmit tau pathology in nontransgenic mice
Source: PubMed Central journal article supplement — J Exp Med. 2016 Nov 14;213(12):2635–54. doi: 10.1084/jem.20160833 (PMC5110027; doi:10.1084/jem.20160833), 2016-11-14
Supplement: JEM_20160833_sm.pdf [file JEM_20160833_sm.pdf]

SUPPLEMENTAL MATERIAL

Guo et al., <http://dx.doi.org/10.1084/jem.20160833>

Table S1. Demographics of human cases used in the study

| Case no. | Neuropathological diagnosis | Gender | Age at death | PMI      |
|----------|-----------------------------|--------|--------------|----------|
|          |                             |        | <i>yr</i>    | <i>h</i> |
| 1        | AD                          | F      | 68           | 9        |
| 2        | AD                          | F      | 59           | 14       |
| 3        | AD                          | M      | 66           | 4        |
| 4        | AD                          | F      | 81           | 5        |
| 5        | AD/DS <sup>a</sup>          | F      | 62           | 4        |
| 6        | AD/DS <sup>a</sup>          | M      | 49           | 5        |
| 7        | AD/DS <sup>a</sup>          | F      | 47           | 10       |
| 8        | Normal                      | M      | 59           | 17       |
| 9        | Normal                      | M      | 62           | 16       |

Abbreviations used: F, female; M, male; PMI, postmortem interval.

<sup>a</sup>Down syndrome patients with postmortem neuropathological diagnosis of AD.

Table S2. Characterization of final supernatant fraction from human brain extractions

| Preparation no. | Concentration of tau by ELISA | Total protein concentration by BCA assay | Purity (tau/total protein) | Concentration of A $\beta$ 1–40 by ELISA | Concentration of A $\beta$ 1–42 by ELISA | Concentration of $\alpha$ -syn by ELISA |
|-----------------|-------------------------------|------------------------------------------|----------------------------|------------------------------------------|------------------------------------------|-----------------------------------------|
|                 | $\mu\text{g/ml}$              | $\text{mg/ml}$                           | %                          | $\mu\text{g/ml}$                         | $\mu\text{g/ml}$                         | $\mu\text{g/ml}$                        |
| AD1             | 1,800                         | 6.5                                      | 27.7                       | 0.03                                     | 0.468                                    | 1.22                                    |
| AD2             | 1,600                         | 9.7                                      | 16.5                       | 0.019                                    | 0.349                                    | 1.08                                    |
| AD3             | 1,500                         | 10.0                                     | 15.0                       | 0.056                                    | 0.324                                    | 1.01                                    |
| AD4             | 1,270                         | 8.3                                      | 15.3                       | not detected                             | 0.262                                    | 0.88                                    |
| AD5             | 1,360                         | 12.5                                     | 10.9                       | 0.054                                    | 0.261                                    | 0.95                                    |
| AD6             | 1,650                         | 10.6                                     | 15.6                       | 0.114                                    | 0.416                                    | 0.92                                    |
| AD7             | 2,300                         | 12.6                                     | 18.3                       | 0.071                                    | 0.069                                    | 4.95                                    |
| AD8             | 1,500                         | 7.2                                      | 20.8                       | not detected                             | 0.066                                    | 0.86                                    |
| Control 1       | 5                             | 10.3                                     | 0.049                      | not detected                             | 0.004                                    | 5.80                                    |
| Control 2       | 2                             | 12.2                                     | 0.016                      | 0.002                                    | 0.010                                    | 7.60                                    |

This table shows protein composition of representative final supernatant fractions following our purification protocols.

Table S3. Antibodies used in this study

| Antibody name    | Specificity                                              | Host species      | Dilutions                                                                              | Source                                   |
|------------------|----------------------------------------------------------|-------------------|----------------------------------------------------------------------------------------|------------------------------------------|
| T49              | mouse tau                                                | mouse monoclonal  | 1:1,000 (ICC; WB)                                                                      | in house (Kosik et al., 1988)            |
| R2295 mTau       | mouse tau                                                | rabbit polyclonal | 1:1,000 (ICC; WB)                                                                      | newly generated                          |
| R2295 h&tmTau    | human and mouse tau                                      | rabbit polyclonal | 1:1,000 (WB)                                                                           | newly generated                          |
| AT8              | p-tau (phosphorylated at Ser202 and Thr205)              | mouse monoclonal  | 1:500 (ICC); 1:1,000 (WB); 1:10,000 (IHC); 1:5,000 (IF)                                | Innogenetics                             |
| 17025            | raised against recombinant human tau                     | rabbit polyclonal | 1:1,000 (WB)                                                                           | in house (Ishihara et al., 1999)         |
| T14              | human tau (aa 141–178)                                   | mouse monoclonal  | 1:1,000 (WB)                                                                           | in house (Kosik et al., 1988)            |
| PHF-1            | p-tau (phosphorylated at Ser396 and Ser404)              | mouse monoclonal  | 1:1,000 (WB); 1:200 (immuno-EM)                                                        | gift from P. Davies <sup>a</sup>         |
| Tau5             | tau (aa 210–230)                                         | mouse monoclonal  | 1:1,000 (WB), 2.5 µg/ml as capture antibody in tau ELISA                               | gift from L. Binder                      |
| T46              | tau (aa 401–441)                                         | mouse monoclonal  | 1:1,000 (WB)                                                                           | in house (Kosik et al., 1988)            |
| K9JA             | tau (aa 243–441)                                         | rabbit polyclonal | 1:5,000 (WB)                                                                           | Dako                                     |
| Anti-4R tau      | 4R tau                                                   | rabbit polyclonal | 1:5,000 (WB)                                                                           | Cosmo Bio USA                            |
| RD3              | 3R tau                                                   | mouse monoclonal  | 1:1,000 (WB)                                                                           | EMD Millipore                            |
| RD4              | 4R tau                                                   | mouse monoclonal  | 1:500 (WB)                                                                             | EMD Millipore                            |
| MC1              | tau in the pathological conformation                     | mouse monoclonal  | 1:2,000 (IHC)                                                                          | gift from P. Davies <sup>a</sup>         |
| AT180            | p-tau (phosphorylated at Thr231)                         | mouse monoclonal  | 1:1,000 (IHC)                                                                          | Thermo Fisher Scientific                 |
| TG3              | conformational specific p-tau (phosphorylated at Thr231) | mouse monoclonal  | 1:250 (IHC)                                                                            | gift from P. Davies <sup>a</sup>         |
| HT7              | human tau (aa 159–163)                                   | mouse monoclonal  | 1:500 (IHC)                                                                            | Thermo Fisher Scientific                 |
| Biotinylated BT2 | tau (aa 194–198)                                         | mouse monoclonal  | 31.25 ng/ml as reporting antibody in tau ELISA together with HT7                       | Thermo Fisher Scientific                 |
| Biotinylated HT7 | tau (aa 159–163)                                         | mouse monoclonal  | 62.5 ng/ml as reporting antibody in tau ELISA together with BT2                        | Thermo Fisher Scientific                 |
| Myc 9E10         | Myc tag                                                  | mouse monoclonal  | 1:1,000 (WB)                                                                           | Developmental Studies Hybridoma Bank     |
| Anti-c-Myc       | Myc tag                                                  | rabbit polyclonal | 1:500 (immuno-EM)                                                                      | Sigma-Aldrich                            |
| HA               | HA tag                                                   | rabbit polyclonal | 1:1,000 (WB; EM)                                                                       | Covance                                  |
| Anti-HA          | HA tag                                                   | mouse monoclonal  | 1:500 (immuno-EM)                                                                      | Berkeley Antibody Company                |
| HA (12CA5)       | HA tag                                                   | mouse monoclonal  | 1:500 (immuno-EM)                                                                      | Roche                                    |
| GAPDH (6C5)      | glyceraldehyde-3-phosphate dehydrogenase                 | mouse monoclonal  | 1:3,000 (WB)                                                                           | Advanced Immunochemical                  |
| 17028            | MAP2                                                     | rabbit polyclonal | 1:5,000 (ICC)                                                                          | in house (Volpicelli-Daley et al., 2011) |
| NeuN(A60)        | NeuN                                                     | mouse monoclonal  | 1:500 (IHC)                                                                            | EMD Millipore                            |
| 9027             | α-syn (aa 130–140)                                       | mouse monoclonal  | 3.3 µg/ml as capture antibody for α-syn ELISA                                          | in house                                 |
| MJF-R1           | α-syn (aa 118–123)                                       | rabbit monoclonal | 0.5425 µg/ml as reporting antibody for α-syn ELISA                                     | Abcam                                    |
| Ban50            | Aβ (aa 1–10)                                             | mouse monoclonal  | 10 µg/ml as capture antibody for Aβ 1–40 and 1–42 ELISA                                | Takeda Pharmaceutical                    |
| HRP-labeled BA27 | Aβ 1–40                                                  | mouse monoclonal  | reporting antibody for Aβ 1–40 ELISA (concentration not determined after HRP labeling) | Takeda Pharmaceutical                    |
| HRP-labeled BC05 | Aβ 1–42                                                  | mouse monoclonal  | reporting antibody for Aβ 1–42 ELISA (concentration not determined after HRP labeling) | Takeda Pharmaceutical                    |

Abbreviations used: ICC, immunocytochemistry; IF, immunofluorescence; WB, western blotting.

<sup>a</sup>Albert Einstein College of Medicine, Bronx, NY.

Table S4. Summary of inoculated mice analyzed for IHC

| Incubation time | Hep-T40<br>(9 µg/mouse) | X-T40<br>(9 µg/mouse) | AD-tau case 1<br>(8 µg/mouse) | AD-tau case 1<br>(2 µg/mouse) | AD-tau case 2<br>(2 µg/mouse) | AD-tau case 3<br>(2 µg/mouse) | Control brain<br>extracts |
|-----------------|-------------------------|-----------------------|-------------------------------|-------------------------------|-------------------------------|-------------------------------|---------------------------|
| 2 d             |                         |                       |                               | 2                             |                               |                               |                           |
| 7 d             |                         |                       |                               | 2                             |                               |                               |                           |
| 1 mo            |                         |                       |                               | 3 + 2 <sup>a</sup>            |                               |                               |                           |
| 3 mo            | 4                       | 4 + 2 <sup>b</sup>    | 4                             | 3 + 3 <sup>a</sup>            | 3                             | 3                             | 3                         |
| 6 mo            | 2 <sup>b</sup>          | 3 <sup>a</sup>        | 4                             | 4 + 3 <sup>a</sup>            | 2                             | 2                             |                           |
| 9 mo            |                         | 3 <sup>b</sup>        | 4                             | 3                             |                               |                               | 2                         |
| 12 mo           | 2 <sup>b</sup>          |                       |                               |                               |                               |                               |                           |
| 18 mo           | 2 <sup>b</sup>          |                       |                               |                               |                               |                               |                           |
| 24 mo           | 2 <sup>b</sup>          |                       |                               |                               |                               |                               |                           |

This table summarizes the number of mice sacrificed at different time points after the injection of different tau fibrils. 2–3-mo-old C57BL6 mice were used unless otherwise indicated. Cells without values are time points that were not tested.

<sup>a</sup>15–19-mo-old C57BL6 mice.

<sup>b</sup>2–3-mo-old C57BL6/C3H F1 mice.

## REFERENCES

- Ishihara, T., M. Hong, B. Zhang, Y. Nakagawa, M.K. Lee, J.Q. Trojanowski, and V.M. Lee. 1999. Age-dependent emergence and progression of a tauopathy in transgenic mice overexpressing the shortest human tau isoform. *Neuron*. 24:751–762. [http://dx.doi.org/10.1016/S0896-6273\(00\)81127-7](http://dx.doi.org/10.1016/S0896-6273(00)81127-7)
- Kosik, K.S., L.D. Orecchio, L. Binder, J.Q. Trojanowski, V.M. Lee, and G. Lee. 1988. Epitopes that span the tau molecule are shared with paired helical filaments. *Neuron*. 1:817–825. [http://dx.doi.org/10.1016/0896-6273\(88\)90129-8](http://dx.doi.org/10.1016/0896-6273(88)90129-8)
- Volpicelli-Daley, L.A., K.C. Luk, T.P. Patel, S.A. Tanik, D.M. Riddle, A. Stieber, D.F. Meaney, J.Q. Trojanowski, and V.M. Lee. 2011. Exogenous  $\alpha$ -synuclein fibrils induce Lewy body pathology leading to synaptic dysfunction and neuron death. *Neuron*. 72:57–71. <http://dx.doi.org/10.1016/j.neuron.2011.08.033>
